# Supplementary material for: Design and selection of optimal ErbB-targeting bispecific antibodies in pancreatic cancer
Source: Front Immunol. 2023 Apr 20;14:1168444. doi: 10.3389/fimmu.2023.1168444 (PMC10157173; doi:10.3389/fimmu.2023.1168444)
Supplement: Supplementary Table 4 — Raw data of phosphokinase activation in C-PDX P4604 (file 1), BxPC3 (file 2), and Sw1990 (file 3) cells incubated with the four lead BiXAb™, the corresponding 2MAbs, or 1MAbs. [file Table_4.xlsx]

## Sheet: P4604
Suppl. Table 4: Raw data of phosphokinase activation in C-PDX P4604 (file 1), BxPC3 (file 2), and Sw1990 (file 3) cells incubated with the four lead BiXAbs, the corresponding 2MAbs, or 1MAbs.
		Mb number	457	458	459	460	823	824	825	826	991		457	458	992	993	994	1063	1064	1065	1066	279	280
		Treatment	Medium 2% SVF	EGF+NRG1b	iMEK	iPI3K	1Cetux	1Matu	2Trastu	3Patri	huIgG1 IRR		Medium 2% SVF	EGF+NRG1b	2Trastu-1Cetu-Fc	2Trastu+1Cetu	3Patri-2Trastu-Fc	3Patri+2Trastu	3Patri-1Cetu-Fc	3Patri+1Cetu	3Patri-1Matu-Fc	3Patri+1Matu	BsAb IRR
Membrane	Target	Phosphorylation site	Pixel
A-A1,A2	Reference	Spot	7729152	8546350	10115342	6484147	10365388	0	10632545	9656874	10370912		6877138	9399265	4895195	8631325	9912186	11744086	9944173	9463347	11083087	10702838	10426763
			8866507	8976473	10105342	6698524	10679409	11738430	10300190	9809381	11031209		7427926	9895219	5506424	8892958	9797022	11947926	9579663	10144128	11297341	10574934	10330746
A-A3,A4	p38α	T180/Y182	776939	1736900	4800905	4930619	5452755	12293284	6163843	6498252	4892394		461074	3393847	1138414	1273296	2264277	4194200	1191350	1982051	3874254	5507733	5911777
			730635	1946612	4744822	4738171	5678353	8714673	5939895	6631624	4590796		468013	3696755	1622443	1151945	2043563	3826301	1163401	1599305	3554143	5313211	6439474
A-A5,A6	ERK1/2	T202/Y204,	1578754	3591205	3652396	8121904	9378734	8719264	8479166	8668057	7875727		1291777	6686124	4220451	2796245	3903705	8435296	2238888	3124582	6730678	8770938	9591589
			1902126	3536681	3456871	8102797	9507859	11577931	8379525	8442758	7816862		1406584	6366760	4336912	2781176	3710451	8353147	2290662	3246936	6274200	8466699	9686180
A-A7,A8	JNK	T183/Y185,	2293511	2740485	6647994	7517360	7934228	11521673	7240777	6321430	7558811		1516306	4543817	2886533	2604331	2448867	7835515	1421407	3912303	3894478	7048625	9292183
			2453207	2709667	5596593	7010929	8135096	9653548	6756951	6261863	7826657		1563669	4370807	3365270	2826869	2695156	8013715	1278649	4079183	3649067	6447511	9236537
A-A9,A10	GSK-3α/β	S21/S9	4321523	6424372	6057322	7465661	11047437	9829424	7638854	8903948	9299964		2992521	7981491	8261818	7391476	5941861	9950135	3091246	6655902	6224595	9143864	10827349
			4160283	5301419	6771178	7556230	10961141	11294965	6276442	9073716	9529217		3472140	7510347	8551143	7477177	6625274	9588002	3792112	5883543	5744047	9236652	10673149
B-A13,A14	p53	S392	1173240	1322630	4800696	3584846	4503062	12071740	2441013	3410604	2951574		898279	1674403	2631432	848105	1324858	2517822	661321	825330	1005848	2223002	3743387
			1135144	1318189	4794429	3508100	4288512	6118525	2484675	3467227	2824289		824931	1814433	2840533	833945	1226006	2314511	676228	794600	1113526	2396975	4096620
B-A17,A18	Reference	Spot	8648592	9083294	11877027	9181869	12751535	6067460	9612931	8252312	11557297		8189344	9897250	12295835	8900608	12143087	12300474	8657818	9154475	10131586	9627775	10913545
			9182576	8786524	11801991	9370858	12423141	12335329	9903096	9058061	10875767		9359405	10105218	12199518	8527102	12250908	11647665	8760779	9713923	9715185	9390724	10945206
A-B3,B4	EGF	R	1492403	7540404	6084475	5787627	4709324	12842699	8225362	6572261	7065031		1561449	8580949	2123633	2233528	5729345	9596159	1398384	1923718	8643535	7473055	10887322
			1430507	7794167	5752241	5878855	4928855	10547508	7301230	6814586	7219976		1458056	8620670	2459341	1979015	5535618	9454281	1413349	1807815	7994942	7415687	10976307
A-B5,B6	MSK1/2	S376/S360	3902070	5548090	6811822	5914357	8907345	10222794	7335296	7238720	7069794		3424248	7049760	5050679	5211168	4686372	9417061	3937706	6212380	8278169	8087964	10675124
			4239448	5647170	6843564	5903350	9135072	11067305	7421434	7611199	7565868		3260527	6563973	4960949	5158072	4360333	9038373	3958304	6065765	8366100	7787580	10578542
A-B7,B8	AMPKα1	T183	890194	1243771	4444539	3620441	4912904	11075887	3989588	3316373	4529206		471814	1647084	869303	1086197	853710	2373079	615492	1251859	1540165	2644948	7514297
			1005694	1217937	3990500	3376098	4699626	5893687	3325342	3306661	4526284		615767	1633796	996592	1285815	861832	2428219	553675	1399016	1442386	2517881	6994450
A-B9,B10	Akt	S473	977593	3751979	4677569	4524750	9542516	5285231	5803982	6324459	6594540		577953	4716257	4517307	4695665	1873902	8689470	1044233	5276709	2442364	4947906	10303161
			948058	3375530	5120489	4292161	9985346	10754577	5193014	6551574	7272646		744742	5275355	5113875	5863486	1990904	8443466	962209	3775165	2190291	4896643	10263842
B-B11,B12	Akt	T308	2116652	3551735	7882100	5225414	9558217	10616743	3958369	5559201	9701521		1987219	3637725	4701163	3696522	2602014	7744672	1657084	2252152	2281688	3508119	8878949
			2173412	3604390	7665137	5354062	8994587	9290468	3799512	5598346	9456952		1811314	3614403	4865487	3377584	2629780	7548298	1694273	2082032	2112044	3894154	8946513
B-B13,B14	p53	S46	2081793	1938685	6671598	4882855	6964515	9814111	3761825	5517020	6426730		1812668	2054319	3443168	1835363	1863170	4730749	1474564	1510024	1699465	3629052	7131823
			1969691	1925177	6776497	4791317	6824878	9030991	3941505	5374392	5874621		1752502	2115427	3895379	1852844	1800277	4229434	1488216	1755778	1886254	3840164	7427707
A-C1,C2	TOR	S2448	584787	531544	2160971	3199761	3812889	8835819	3328874	3450549	3087826		231959	534785	785312	349160	1080757	2405721	1242596	1491120	1913567	1377234	3847654
			597848	560500	2437002	3205926	3930916	4985087	3505057	3617568	2838767		499926	569693	1011717	330188	1003925	2509994	1352830	1451100	2120162	1332551	3905001
A-C3,C4	CREB	S133	7659930	6504521	4653260	5482656	9156703	4930696	7691421	6299057	5704876		7853971	6615070	6955930	5457715	6061100	9917477	6322532	8152114	9619568	6860752	11018610
			7150864	6689313	4289181	4774047	8818959	10744171	6877607	5768025	5455907		7109482	5576505	6846957	5551211	5721274	9436473	6633699	8228745	9993519	6667632	10851506
A-C5,C6	HSP27	S78/S82	1796089	3038850	5775630	6990951	8421989	11261925	5999209	6162489	8016704		2439036	2589911	2917730	2253080	2413674	5490029	1429864	2699518	4295130	3241360	9818175
			1713819	3085957	6030130	6963671	8174820	9578990	5793653	6196479	7924123		2168705	2325913	2460876	2465719	2216343	4947710	1268191	2432304	3411622	3209036	9526679
A-C7,C8	AMPKα2	T172	756576	833452	3659299	4234708	5403708	9798925	3273825	4595665	3093493		773546	582335	895453	1452059	1161504	2109575	1112703	1513610	1865676	1615643	5180582
			780126	790881	2989255	4133883	5460018	6162450	2835969	4529703	3168498		834584	660463	853084	1874552	1157265	2016973	973690	1565687	1870193	1648756	5138568
A-C9,C10	β-Catenin	___	706283	649750	2319162	2921600	3052434	6305815	1479037	2655697	2053507		837874	696852	454293	1196444	587207	1668015	518636	1075133	1132426	1097175	3230466
			668941	542320	2234389	2657609	2737337	4157195	1325788	2337734	1891192		1004171	801754	464565	1098730	584971	1906733	439382	916109	942973	1011092	3239993
B-C11,C12	p70	S6	2054725	2539475	6493548	2911755	6929532	3934714	4693466	5496463	7778735		2314184	2502326	3190839	4930687	3013464	6912856	1600251	2343986	2277201	3401132	8561149
			2098773	2547696	6011156	3124355	6314799	8234931	4562410	5168559	7647827		2538028	2482591	3189786	4800243	3098698	6570789	1402722	1985844	2065942	3550459	8542582
B-C13,C14	p53	S15	827964	647219	3207193	1934886	3765160	7994963	2004008	2014727	3185260		1015153	703957	896538	1178281	850884	1950673	535187	669376	624132	1242312	2898580
			738987	649513	3230416	1969881	3849721	3619137	1939389	2022563	2636121		1024786	707154	969653	1044412	756162	1703804	543700	636923	614969	1141213	3117645
B-C15,C16	c-Jun	S63	8376260	6290001	8295206	5522488	10410698	3389835	6648419	6146755	10449137		8149535	6189343	9708931	8795347	7999260	10447908	5977136	6860587	7975179	8274012	10686399
			8249228	6280043	9105275	6680546	10997602	12301327	6118149	6303708	9429726		8211611	6424860	10224021	9290732	9041108	10690857	6079723	7132616	7712594	7814485	10773934
A-D1,D2	Src	Y419	1318450	1191820	3368622	4820098	6332385	12161295	7631595	6032872	6526802		827495	1092615	1448032	1745793	1742780	4115370	2227177	1724399	3923966	3246123	7261053
			1241449	1223919	3874986	4793478	6381330	8952167	7634732	6069146	6212805		1336433	1091876	2063808	1661647	1453982	3839371	2325078	1573530	4103834	3201595	7184387
A-D3,D4	Lyn	Y397	414032	356153	1593555	1962189	2694261	8684885	2095941	2425629	1899496		497400	187876	592281	397149	582217	1448980	812727	553466	1383398	1002876	2744453
			374364	361223	1862588	1936630	2928328	3808119	2083929	2220982	1989038		498658	139894	633171	381228	647670	1441269	807026	492921	1584930	1012544	2585425
A-D5,D6	Lck	Y394	297780	313605	1706293	1433078	2179107	3409284	1304501	1617798	1420120		389337	63131	394426	170532	328310	901223	558362	243587	955466	642924	1877261
			288294	334152	1659606	1444132	2145692	2720468	1203240	1388325	1191985		357124	60578	253053	188468	264333	769695	437463	206281	715417	512570	1641570
A-D7,D8	STAT2	Y689	1225301	1236944	4820277	5488189	6613609	2583542	3700762	5586227	4079850		1908931	907351	1397474	2315967	1177227	2268385	1486854	1647516	2311992	2102565	4991738
			1332876	1136142	4141881	5297694	6082267	7428908	3318482	5501571	4328120		2055932	953807	1335300	2856750	1176976	2335989	1360355	1780113	2047195	2228902	5016349
A-D9,D10	STAT5a	Y694	671821	521715	2151317	2768657	3930509	7310238	2052377	3368502	3318430		1042829	479281	665885	1753466	759731	1849328	617867	868348	1238212	976314	2491145
			621202	494912	2005235	2389338	3975632	5410879	1910733	3174753	3188771		1088119	660303	661064	1617229	801368	2070894	573496	774178	1056433	905420	2576750
B-D11,D12	p70	S6	1996695	1783437	5151632	3495994	8692683	5618664	4786028	6049812	7919970		2705484	1751124	2592114	4598901	2837879	5725028	1525826	2508224	2105992	3491017	8590746
			2009193	1772832	4785501	3899141	8224208	9753816	4382102	5753018	8065624		3058195	1831543	2853204	4599054	2791366	5384076	1435891	2271506	1959522	3524914	8435523
B-D13,D14	RSK1/2/3	S380/S386/S377	855040	869176	3135674	2399676	5505298	9673228	2874330	3496707	4301745		1494646	899584	1307174	1802405	1165573	2445222	721187	889063	867844	1894781	4964833
			748995	822240	2764658	2406821	5414813	6738752	3024756	3290368	3625449		1338541	827833	1209627	1606644	1107883	2249583	695753	894921	807610	1729863	4579873
B-D15,D16	eNOS	S1177	545826	668474	3106886	1999560	3222224	6309557	1686998	1784223	2106893		868518	742346	1143127	1204647	800617	1347567	442587	478147	578956	819906	2756628
			500091	628076	2626937	1958508	3340683	4149654	1669849	1794017	2012631		694605	742370	1408527	1359607	886082	1428557	411495	495014	603197	1049660	2668533
A-E1,E2	Fyn	Y420	336585	267743	1364145	1913665	2807911	3775545	2482288	2244885	1944221		67615	66965	340430	950886	768976	1613524	1093064	670304	1504132	983950	1830694
			361762	288982	1560377	1979649	2783185	4023999	2562153	2524431	2118762		350547	54031	628851	933010	668492	1368362	1122021	605013	1593311	999221	1911246
A-E3,E4	Yes	Y426	1123947	1241660	3753308	4676373	5508821	4145042	6058317	5338810	4905645		1994309	828673	1814989	2366548	1261904	2481609	1937786	1140235	2865923	2546961	4423879
			1037505	1285636	4019658	4544735	5067501	6693389	5931449	5172618	5010454		1979758	819428	1936991	2219012	1200035	2420081	1889791	1090474	2957899	2438613	4157390
A-E5,E6	Fgr	Y412	281821	181557	1389080	1387215	2107912	6250437	1403495	1677680	1205272		462622	0	310170	470166	368238	662448	550530	288906	848018	465800	860682
			269241	252026	1312314	1366638	2014590	2536064	1133124	1517420	974817		461038	52237	232834	403633	305003	579483	452609	180169	544251	380918	645913
A-E7,E8	STAT6	Y641	797404	969615	3588957	4207536	4730667	2334690	2777013	4239992	3276231		1488307	831482	1030177	1881147	847056	1623594	1018315	1172210	1750077	1372170	2351023
			849998	1070696	3067567	4119366	4790549	5495815	2242367	4377740	3169521		1650976	1059116	1085714	2105516	820913	1570206	907041	1225754	1579555	1379859	2383162
A-E9,E10	STAT5b	Y699	633328	831967	2700106	3561477	4213009	5566593	2672872	4410345	4125005		1196438	868808	1015478	2122410	958466	1976386	638156	957729	1293328	961052	2083741
			594263	767845	2555888	3322451	4386049	5974574	2548916	4184201	4429696		1202266	1066713	1129401	1996455	1091859	2191073	559214	899085	1196235	973282	2192303
B-E11,E12	STAT3	Y705	759487	667363	3505432	1959621	4878835	6258241	2210740	2555003	2970716		1436477	697183	1031528	1978126	1199317	2131815	577568	995345	725450	1651341	3197036
			790666	726061	3485483	2086001	5120201	4813909	2541322	3141187	3482559		1578745	782362	1146805	2096886	1346327	2114698	653935	989164	797480	1606420	3608037
B-E13,E14	p27	T198	831177	1049391	3170302	2437472	3840902	5338990	1706349	2097868	2182724		1680608	1067857	843500	1852848	1116495	1312454	454651	573289	484327	1076871	3203397
			788300	989450	3008847	2371729	3765328	3669582	1588722	1878680	1933552		1589012	1019756	790919	1778042	983668	1316773	411898	471669	439753	1104717	4726870
B-E15,E16	PLC-γ1	Y783	994957	1131055	4426617	3702074	3243149	3340209	1833755	2160290	2676133		1852031	1277988	1160328	1628161	1037093	1740414	574811	609047	699598	1060907	4759429
			991960	1018820	4132276	3713162	3194619	3499170	1744796	2145465	2636525		1613594	1181122	1300169	1727916	1003956	1701585	573475	584719	680334	1115742	3920453
A-F1,F2	Hck	Y411	494778	380069	1226534	2234573	5510815	3009444	4207108	3721309	2869338		783276	129514	476171	1757840	1390876	2052475	1893433	1090018	2161134	1397762	1766592
			687989	376289	1371989	2235287	5649376	6480872	4380078	4323229	3184504		1162346	110203	892943	1639369	1248625	1880730	1937803	1191292	2133019	1354323	1860902
A-F3,F4	Chk-2	T68	1681259	1236270	4115228	4951818	5388425	6219182	4072430	4017513	4683694		3298079	808686	1791013	3416264	1605289	2874933	2337473	2015828	2722955	2152009	3155278
			1653077	1334694	4460231	5035621	4779827	6608563	3791389	3871764	4492572		3427721	975730	1816223	3392037	1495676	2732268	2260475	2081521	2956850	2126122	2976427
A-F5,F6	FAK	Y397	1022673	1012070	3541730	3454048	3483981	6470877	2247716	2812474	2154435		2203788	995341	636922	1173756	812126	966849	1023423	897761	1415301	1167415	2032465
			1000768	1001364	3631959	3288649	3115388	3983027	2082811	2491005	1938848		2167912	1205163	564487	1026765	667265	854496	890311	698306	1285129	992214	1872615
A-F7,F8	PDGF	Rβ	417247	412492	2264466	2465922	1855676	3451111	968043	1490765	1282846		899930	643760	390771	782410	343094	456258	438356	341467	516579	667654	1205817
			454368	502520	1952424	2373382	1620441	2297416	805439	1389226	1372480		895240	789309	457035	850525	311442	454477	291429	377333	450565	688106	1131750
A-F9,F10	STAT5a/b	Y694/Y699	744904	893043	2473350	3543747	3081938	2327408	1941462	3206057	3099526		1575015	1389143	1022288	1519011	711372	1267384	611589	831929	943918	1002730	1740280
			690756	753579	2373819	3322878	3090267	4023845	1805598	3163873	3168453		1535198	1352879	1202953	1598753	795135	1455876	607996	719076	862371	965191	1789025
B-F11,F12	STAT3	S727	1248380	1114785	3541609	3532119	6214807	4070747	3252433	4463980	5214790		2652320	1330317	2353090	3731236	2068186	2541715	786841	1296789	923854	2505014	5543945
			1219299	1120399	3327888	3780640	6171149	6752940	3166621	4596443	5854508		2586270	1280036	2235110	3582748	2197989	2312822	762867	1299114	810963	2458515	6039237
B-F13,F14	WNK1	T60	2079172	3220019	4762474	4609426	10273209	6965282	5145330	6551677	9169311		4377933	3338032	4116139	6582975	3743972	5874542	1528476	3023048	1538802	3792570	8571991
			2035453	3152127	5040382	4935670	10082036	10111557	5233872	5721346	8931136		4275499	3370017	4160149	6479707	3746555	5807982	1539677	2820928	1524232	3778952	8584990
B-F15,F16	PYK2	Y402	1221909	1393718	6004666	4810412	4050284	10300177	2235432	2550093	3263894		2626455	1637059	1658334	2085636	1327061	1822217	678571	767703	732794	1542400	4473698
			1246972	1306203	5591671	4493795	3741471	4691357	2183795	2574287	3145095		2401154	1566713	1711693	2112512	1229988	1878267	727096	720054	750545	1492333	4270265
A-G1,G2	Reference	Spot	7854628	9397549	3672516	7680194	11682393	4151058	11617460	10562240	8351153		9389086	7515577	6378553	10035319	9975141	10062267	11112590	11073033	10621273	9472286	9158525
			9242606	9734607	3149769	8648533	10464123	12262580	11161020	9467923	8345524		10301062	7757088	8069642	10929628	10357900	9767494	9699376	11197034	10374018	9464665	8841818
A-G3,G4	PRAS40	T246	2243403	4725535	5460753	7348051	9760722	12258348	7833423	7173001	8079637		5069944	4056542	4097893	8225069	3975902	5742524	4704886	8137921	4772482	5427232	5608468
			2014074	4610043	6442477	7057976	9411564	10886940	8046712	7214011	7978801		4935195	5852160	4253531	8021241	3908703	5662176	4658295	8312325	4899778	5179354	5339140
B-G11,G12	HSP60	___	4785345	3603832	6738250	7856332	10396426	827094	5790976	9434885	8872602		8387083	6273817	6518674	7351244	8000363	6377926	2800877	4082453	2117386	5047480	8009964

## Sheet: BxPC3
		Mb number	201	202	481	482	321	322	323	324	203	325	326	327	328	381	382	383	384	204
		Treatment	Medium 2% SVF	EGF+NRG1b	iMEK	iPI3K	1Cetux	1Matu	2Trastu	3Patri	huIgG1 IRR	2Trastu-1Cetu-Fc	2Trastu+1Cetu	3Patri-2Trastu-Fc	3Patri+2Trastu	3Patri-1Cetu-Fc	3Patri+1Cetu	3Patri-1Matu-Fc	3Patri+1Matu	BsAb IRR
Membrane	Target	Phosphorylation site	Pixel	Pixel	Pixel	Pixel	Pixel	Pixel	Pixel	Pixel	Pixel	Pixel	Pixel	Pixel	Pixel	Pixel	Pixel	Pixel	Pixel	Pixel
A-A1,A2	Reference	Spot	8494262	11060393	11802534	10864824	7689993	9748295	11402250	11758770	12473549	12156641	10046687	8478944	9416514	7603543	10491537	9856316	13300703	14952597
			8751357	11953906	11411867	10534816	9938267	9831248	9747196	12280664	11897698	11669969	9739510	7578966	8848501	6614732	9972438	3846907	13142654	14301215
A-A3,A4	p38α	T180/Y182	205999	1573206	1215630	871956	1012618	675824	755717	1584151	738737	1191284	781373	589046	1582593	340581	518044	0	1927615	2121662
			278161	1898391	1311207	888517	1283608	709663	528263	1635199	1083260	1303600	878357	505507	1450896	338832	324944	399191	1834593	1669973
A-A5,A6	ERK1/2	T202/Y204,	2352878	9416533	7011015	6298075	6693528	6371591	4845344	7958575	8793717	8702972	5593622	1458394	4340425	1640426	2858368	6256330	9876546	8498538
			2194870	9746327	8186488	7334325	8359457	8000226	5763664	7798380	8972024	8509726	5538950	1291343	4263755	1685310	3201376	7873443	9594198	9148030
A-A7,A8	JNK	T183/Y185,	991709	2057657	1905533	1416530	2336935	2232983	1636285	1777574	1520076	2096028	1250952	222930	1258964	279612	397072	1274020	1215932	1777750
			1038595	2383701	1872353	1493254	1978605	2404814	1972404	1678729	1774052	2209617	1418466	327835	1314595	273863	437530	1272390	1178295	2140162
A-A9,A10	GSK-3α/β	S21/S9	5329055	9242487	6808271	6746652	5021232	7384579	7206728	4089642	8051206	7783017	5935001	1818840	3910524	1683071	2900367	6955441	5723460	9479703
			5420151	8831440	7114002	7014685	5844012	6853851	7778976	4398988	7423848	7819262	5898074	2026445	3379047	1932073	3266368	6409123	5312029	9063890
B-A13,A14	p53	S392	2358321	10326438	4677779	7004575	8230039	9645624	8027243	9423333	9747275	9078216	7637574	1561139	4835506	1476869	2183204	6024903	4714127	8077195
			2370019	9951908	4726222	7726471	8666228	10117929	8383438	9245791	9663188	8466372	7683331	2106730	4909095	1540503	2193363	6503937	4634937	7937568
B-A17,A18	Reference	Spot	9259839	13611299	11532140	12158200	13241608	13800086	8720968	12882371	13626865	13903062	13170642	10067450	10574365	5211910	8292849	12690474	11554315	13579256
			9945307	12981248	11972223	12473940	13338457	13704538	10168123	12767095	12130024	13841201	15027060	10748159	11447385	5923193	8291789	12075006	11643898	14322667
A-B3,B4	EGF	R	493959	7660821	6766121	4921044	2426893	1125554	7360813	9937193	5647611	2441387	967766	3538491	5330144	342250	523175	65074	4831098	7889521
			578148	7573329	6761311	5848776	2946740	1222598	7413030	10055308	5146225	2602254	1028674	3285460	5131512	371553	457645	838610	4793949	6921144
A-B5,B6	MSK1/2	S376/S360	1816920	4344617	4450632	4118515	3404697	2726911	3179205	5892831	3822865	4158793	2195117	1222162	2261080	771264	783926	1618053	4410193	4901409
			1737940	4421490	5124230	4558294	4114325	3767217	3410979	5850625	3791753	4075848	2225474	1012924	2224558	829751	834477	2304877	4084029	4795715
A-B7,B8	AMPKα1	T183	1094036	1477083	1782517	1418112	2040509	1663978	1208685	1850103	1179606	1750016	1108608	294144	859577	345588	319033	821708	1128970	1233493
			1076122	1772414	1677272	1621228	1782440	1868658	1394585	1760403	1225897	2004925	1295493	307628	976639	337211	327632	894286	1112056	1445896
A-B9,B10	Akt	S473	430682	3341323	5150327	3096756	3844166	8499092	2672679	1694708	3149516	8505654	4624902	246409	847021	204530	609423	807426	748025	3791408
			515262	3382413	5433533	3325979	3903066	7891398	2603518	1599902	3383781	8570727	4522546	286722	640627	176825	709819	844821	777552	3580349
B-B11,B12	Akt	T308	1701261	2802101	1952544	1995058	2554589	1725940	2308080	3073136	2565757	3494740	2106138	427479	1307850	483793	1344177	2303100	1749994	2016190
			1454123	2838930	1838233	2293733	2572185	2853173	2448716	3289751	2682679	3812283	2309019	472288	1254311	463133	998595	2406382	1869140	2527824
B-B13,B14	p53	S46	3542212	8318185	3877695	5752209	6844417	8919222	6983526	8554410	8506265	9396459	6486690	2262790	3226562	1327139	1615591	5736006	4109773	7895109
			3066468	7908708	4036142	6096771	7729240	9377927	8321568	9019939	8338624	8869248	6601352	2445046	3398248	1380687	1712505	5742873	3765614	7803017
A-C1,C2	TOR	S2448	579310	1285507	963067	719122	1964704	939346	1117603	2090615	1295577	1374622	657952	1091614	1387633	5358	1377982	332961	2491035	2690997
			736505	1700694	1072607	764432	1538356	874653	1128520	2084073	1290330	1365508	723359	1000461	1166183	0	1043787	67375	2224130	2071846
A-C3,C4	CREB	S133	5964321	9181612	5246766	4611912	7119448	5894596	7520879	9488316	6021033	8085029	4241377	3163616	3734825	1147700	2755022	635378	7159474	8891552
			5581519	8962551	5405312	5123438	7788185	6640600	7956914	9598841	5329172	8763791	4569319	3165077	3690417	1452777	2628642	1570029	6451811	7263691
A-C5,C6	HSP27	S78/S82	767970	1286829	1477026	1108726	1901783	1185827	1280421	1764278	759319	1405049	683700	531485	498566	247340	268115	241087	810788	813820
			927453	1224001	1482067	978670	2098312	1391651	1208453	1683443	679029	1336867	659968	471950	493253	285895	212364	267981	662117	1000236
A-C7,C8	AMPKα2	T172	1211758	1628939	969970	920497	1846573	1691026	1110881	1624645	1248779	1462210	889230	445664	735123	460652	398556	592235	1171152	1550802
			1168542	1737627	1081124	1049810	1658839	1808552	1179006	1580987	1409521	1535058	1005891	428720	893468	442115	425619	788565	1337378	1785370
A-C9,C10	β-Catenin	___	3104268	4561599	2702930	2947864	3076540	4312070	3543685	4080231	4525080	3737594	2938794	972026	1967937	871443	1005357	2000989	3256952	5197451
			3243420	5057637	2730323	2959652	2646206	3630588	3551042	3643287	5243244	3852927	2652246	963834	1567813	893390	1115945	2161658	3229553	5885751
B-C11,C12	p70	S6	1338106	2555649	1163856	1220236	2348484	1452871	1774040	2465385	2459107	3047903	1542076	720432	764426	326947	662072	1661371	1207518	1311964
			1171828	2486662	1199657	1251662	2502149	1918823	1992474	2480133	2332347	3215385	1492775	798999	871210	282916	514442	1640799	1218571	1722269
B-C13,C14	p53	S15	1459675	3048490	965410	836512	1568534	1169041	1283978	1363738	2471459	2154621	953126	463300	398390	342404	425496	1758573	1057818	2085760
			1379155	2140780	978557	783696	1577290	1389196	1359071	1158940	2369560	1953056	1058690	400375	258074	315542	375415	1876856	832154	2196733
B-C15,C16	c-Jun	S63	1869076	3357554	2647353	2780622	4147756	4217914	5361965	4463645	5688933	4182825	2680936	1605735	1698276	492104	707194	3406541	1553256	6981880
			1802999	3971843	2509560	3197254	4225316	4548669	5722282	5112052	5724612	4039351	2651928	1173633	1779861	482747	599365	3232322	1623969	7285456
A-D1,D2	Src	Y419	1146259	1759974	1927071	1447617	3036014	1601316	3175416	4334886	1784717	2339441	1025856	2164354	1701939	282682	1977418	635213	3522752	3684940
			1363912	2970174	1960204	1510231	2706887	1516001	3192477	4340281	1918120	2451551	1154315	2046908	1595702	380634	1514208	287760	3018296	2951134
A-D3,D4	Lyn	Y397	492969	708624	640963	751902	593562	426677	861684	1754010	583878	854583	273556	396321	237982	149528	200883	10284	596422	700592
			555095	618793	709737	933989	680970	423158	1000720	1589417	298777	921681	342796	357583	171456	142107	181506	133331	620900	443142
A-D5,D6	Lck	Y394	311922	316904	599777	461259	638934	277644	396103	649403	181516	555428	143819	218967	40499	135781	91614	144838	355484	281648
			373272	286947	630301	402930	695999	384947	332278	592739	188034	532146	171329	203007	46904	163350	71798	159217	244682	444643
A-D7,D8	STAT2	Y689	2584534	2679299	1603213	1467533	2806769	2341140	1579246	2297188	1910246	1966902	1272685	735594	1026827	669490	558596	908875	1632225	2988850
			2459320	2611956	1737173	1579625	2476630	2461274	1837528	2332490	2134956	2107101	1337987	693083	1075251	640215	594647	1089391	1929618	3052453
A-D9,D10	STAT5a	Y694	571669	829561	853884	888940	599908	954308	823822	1177811	777190	953165	725942	309760	325353	265500	230620	551248	921183	1225460
			529960	953857	734333	843185	527520	888937	828014	1211260	880939	915118	693104	264748	251001	226043	261268	646667	946058	1213641
B-D11,D12	p70	S6	2073102	3066451	1399799	1150984	1951908	1797551	1936371	3125533	2811879	2717458	1688482	862107	664488	597126	925347	1757546	1898853	1582808
			1924302	2969841	1370147	1133704	2153176	1976001	2086565	3119063	2425599	2741340	1665943	878722	829405	465736	763638	1644540	1796572	2089096
B-D13,D14	RSK1/2/3	S380/S386/S377	982978	2155017	930144	740815	1701333	1342256	1461094	1605439	1773643	2306475	1168485	602489	454276	265185	393867	1337002	1072389	1611474
			541510	1948460	893476	655411	1749980	1593284	1501459	1360140	1934220	2169193	1160448	517941	328781	224744	348971	1420646	864881	1600883
B-D15,D16	eNOS	S1177	295853	696272	342234	307516	548969	685010	789374	1004230	775840	757479	609586	114272	100338	57846	123066	453837	221091	794531
			287670	422176	334345	370477	539483	727658	936852	1157744	728792	760282	613362	117863	148731	42162	40660	455423	242841	741580
A-E1,E2	Fyn	Y420	151045	296839	630410	382691	689969	737546	943179	1353293	591232	797796	169608	728314	316095	370525	598942	308512	1089007	788441
			197502	513719	646609	393381	522910	688815	961524	1309135	627201	884050	285804	597748	325822	389105	492350	164220	1042306	593270
A-E3,E4	Yes	Y426	1533338	1559471	1593861	977436	1635473	1202434	1556855	1504951	742950	1470190	641125	885498	712808	485505	451072	231268	1310949	1541838
			1783867	1611853	1192893	1136071	1960156	1176621	1440514	1489281	710302	1477844	691065	875418	665396	332867	437004	572279	1256941	1371665
A-E5,E6	Fgr	Y412	513039	279076	279983	239715	435164	114754	238565	297281	56120	334007	52445	284420	83220	178522	99953	212235	233492	326353
			491693	203655	372747	244053	545787	139485	174888	315739	49827	302993	60414	271905	96570	205905	87483	231574	218402	325309
A-E7,E8	STAT6	Y641	2098530	1883877	1455251	1154910	2605829	1744994	1306058	2254123	1647682	1507906	1006877	732861	978408	611567	406812	987729	1541746	2421761
			1993079	1838154	1738983	1358462	2343961	1753535	1488706	2193395	1723116	1618713	1036257	676232	949261	579489	468242	1090676	1537436	2291881
A-E9,E10	STAT5b	Y699	841821	1555538	1171721	1015243	783009	1119085	1028467	1523231	922021	932801	730890	546773	528327	448911	440763	863689	1380492	1838786
			922556	1614801	1135788	958489	691252	958289	994715	1399709	1131296	563037	726926	531431	403931	398834	488382	984807	1339088	1882722
B-E11,E12	STAT3	Y705	1259109	1623136	691929	366872	366349	890588	998686	1592692	1883114	1364935	941385	630997	395886	234984	592764	740903	933148	1057402
			1204703	1808726	792573	475232	787596	1022914	1071522	1740795	1811226	1543976	998997	698116	467387	273494	514839	871818	921222	1151288
B-E13,E14	p27	T198	591778	1620582	672672	445469	1183803	1154470	1168507	1507892	1195250	1369940	774176	564357	397326	102312	232734	442529	349339	953571
			454779	1424481	650974	391988	1135240	1339665	1260765	1358386	1174486	1271377	769374	508775	381714	77747	175362	462190	272553	915482
B-E15,E16	PLC-γ1	Y783	608159	1110980	713263	379310	1031111	1143021	927106	1101642	1178949	1138434	699245	386897	354745	121175	259286	766131	436168	1186709
			657911	769388	646164	469392	1048203	1121035	954148	1070987	1042823	1053117	667716	395862	405220	83240	170315	708886	474404	1216600
A-F1,F2	Hck	Y411	762227	988053	1116945	449787	853589	740279	681687	1115795	1386079	923662	114878	1243419	892720	1185687	1108786	624634	1560663	1481005
			965161	1093763	1033070	475329	647817	694921	769242	1085527	1251543	931862	261510	1168601	815244	1305039	926760	549181	1234023	1368137
A-F3,F4	Chk-2	T68	1814276	1576203	1585876	906616	1515925	1997543	1822048	1814241	1110701	2000250	755783	632762	747480	628011	584762	707094	1011170	1810952
			2231705	1631944	1498118	1142741	1806131	1991601	1738016	1819559	968272	2032553	835135	766304	731512	570058	574690	898077	1018918	1531178
A-F5,F6	FAK	Y397	2428346	1139150	1806796	1068918	2336541	1493975	1594083	1890240	694883	2309591	724450	755324	721371	364738	290008	524325	582445	1418355
			2123890	651483	2167204	1065323	2436658	1441894	1512300	1916153	564633	2189882	788022	747123	841060	375535	222234	497824	628629	1391142
A-F7,F8	PDGF	Rβ	668962	382049	736284	523986	1192544	660894	576299	868844	409865	680266	338142	351444	382673	281791	102922	386878	445886	828444
			568939	448645	744471	575126	1083720	661598	585443	845332	381661	726377	403049	361343	391173	274638	115763	452381	459108	825775
A-F9,F10	STAT5a/b	Y694/Y699	1147360	1133312	1144064	1090225	1290248	1274240	1098132	1438189	546328	1183112	804580	638918	717691	394733	272129	801184	1189161	1810613
			1029901	1107985	1141776	1054392	975615	1254217	1160021	1414873	1063807	1198528	826481	561824	608401	351317	260683	854166	1168924	1755493
B-F11,F12	STAT3	S727	2495240	3319695	2224623	1073897	899786	2307901	2686140	2848695	4030039	3480839	1793161	1517911	883894	293428	1391153	2073764	2490795	2845746
			2152668	3067419	2100594	1107743	1452684	2486334	2614707	2870945	3770114	3685221	1824288	1518136	1062847	561910	1191564	2019624	2163407	2871677
B-F13,F14	WNK1	T60	753050	4621237	3191442	1437540	4021295	4801419	4452117	4288298	4067145	6608594	3216983	1446063	1088259	727944	1298905	1598103	1470428	3470619
			619635	4169808	3177805	1302955	4418794	5338415	4549437	4252537	4052312	6890500	3323787	1371852	1041669	753367	1330289	1830596	1569499	3524406
B-F15,F16	PYK2	Y402	910153	1808092	1238891	557588	1957832	2319399	2123044	2533321	2088831	2411943	1440911	497813	810613	179763	430168	1001460	791197	2575679
			1088448	1388193	1182687	596216	1943159	2168391	2130288	2391741	1902198	2262953	1349083	837296	803826	122792	415208	970663	728841	2389384
A-G1,G2	Reference	Spot	11604953	10135650	12266517	12483268	10912052	12154744	11119514	12054986	13680296	11918920	7675136	10643066	8297875	9460210	10485139	11997632	11982576	11279540
			12623751	10239553	12196536	12670265	10226913	11541628	11041064	11552189	12978451	12175037	8093268	9782055	8305389	9229577	9517496	11253026	9857349	12416461
A-G3,G4	PRAS40	T246	6394370	6244659	5758883	3819449	3607312	6811834	3816728	2183748	5719504	6801859	2248382	1376572	1036054	1063788	1685261	2054725	306063	7388349
			6244619	6338967	5924394	3485257	4392829	7086562	3921297	2056808	5043358	6738276	2305263	1279986	975108	1002632	1624255	1841136	299287	6266273
B-G11,G12	HSP60	___	9421045	9126075	4406629	7350455	3202075	8727900	6919435	5873625	9068891	8259396	5699029	4377581	3239661	1722734	3607412	3852542	6880618	8156547
			8759791	8284010	4775396	6482360	3552103	9082608	7507436	5951991	9131642	7951877	5362032	4282709	3582116	1973018	3254206	4291658	6072090	8419537

## Sheet: Sw1990
		Mb number	337	338	339	340	879	880	881	882	851	852	853	854	1059	1060	1061	1062	277	278
		Treatment	Medium 2% SVF	EGF+NRG1b	iMEK	iPI3K	1Cetux	1Matu	2Trastu	3Patri	huIgG1 IRR	2Trastu-1Cetu-Fc	2Trastu+1Cetu	3Patri-2Trastu-Fc	3Patri+2Trastu	3Patri-1Cetu-Fc	3Patri+1Cetu	3Patri-1Matu-Fc	3Patri+1Matu	BsAb IRR
Membrane	Target	Phosphorylation site	Pixel	Pixel	Pixel	Pixel	Pixel	Pixel	Pixel	Pixel	Pixel	Pixel	Pixel	Pixel	Pixel	Pixel	Pixel	Pixel	Pixel	Pixel
A-A1,A2	Reference	Spot	2393233	4278296	3477939	3796030	2512006	2981644	1995234	2586267	3334235	4499219	3704984	3604466	1821417	2565583	2651651	3323012	5161752	2879661
			2755160	4130307	3428879	3462784	2429601	2889410	1895458	2862266	3432975	4459873	4017610	3845138	1816307	2630754	2746440	3333020	5362779	3148070
A-A3,A4	p38α	T180/Y182	253262	375387	289758	300230	188049	178523	82106	223902	185849	250431	164143	200896	63215	89347	98684	202013	470821	307416
			199696	349074	273588	280983	197652	162630	79773	227512	227289	235347	154855	212279	18765	63128	113583	185388	388846	294864
A-A5,A6	ERK1/2	T202/Y204,	206392	845913	166167	797937	317266	531165	407093	743321	1085295	660023	464561	1075444	98436	124040	311632	407544	1312350	697783
			183594	860103	139078	847880	322903	533853	390013	763965	979599	665753	545337	1108598	71160	107723	343936	364334	1315539	734356
A-A7,A8	JNK	T183/Y185,	291205	507787	409836	497759	257404	235698	46823	223795	339982	344836	277808	333804	3936	128886	236374	169555	486936	346525
			253420	511006	451903	509521	208359	252040	52660	210008	321152	389668	334101	366674	3375	132662	237650	157720	435020	334901
A-A9,A10	GSK-3α/β	S21/S9	731366	1918586	1711379	1669316	1047602	1166411	591913	1025198	1134830	2206431	1961113	1893464	312389	493892	770665	931300	1923470	1062319
			717055	1705420	1649718	1794865	1129685	1175467	508464	1050209	1115607	2154522	2173173	1654695	434161	509005	762737	957820	2132223	1051501
B-A13,A14	p53	S392	1534587	3526600	3418726	3968571	1768937	1918565	1295257	1879758	1870602	3184209	2532960	2579471	1492879	1464170	1327516	1523695	2343509	2877753
			1490833	3081856	3502734	3903833	1850563	2177850	1466625	2026881	2083701	3326674	2864476	2684509	1513279	1593892	1383722	1673535	2755453	2977577
B-A17,A18	Reference	Spot	2219355	3955276	4229327	4133363	3232448	3538150	2771145	2673434	5934125	4787661	4585625	3106151	2277073	3023633	2440735	2770909	3534443	3786291
			2377422	3390438	3811905	4156086	2887244	3279298	2752108	2781210	5075417	5387324	4600988	3080603	2435714	2545103	2296091	2647044	4945820	3624495
A-B3,B4	EGF	R	306962	935447	830138	561163	137357	398484	372826	499584	199858	180752	124089	437416	149556	63286	69157	469639	785087	452735
			279249	912002	830777	574634	139952	409303	363137	418399	253792	202846	114715	466120	112245	42397	82609	484159	784513	451492
A-B5,B6	MSK1/2	S376/S360	420592	644759	371249	568495	358170	489039	253490	418792	562069	478666	400763	720821	112668	175794	262660	387877	841473	611404
			399917	631176	369276	548485	357383	460151	235279	424778	549746	512846	475207	745202	95211	196330	287265	351503	819901	623795
A-B7,B8	AMPKα1	T183	319741	517603	412146	325724	226972	204536	41442	142203	226167	256225	275303	312341	0	66877	182559	121938	482856	354080
			296560	507820	416074	391465	183682	200318	47352	178119	211968	271529	276771	327414	11948	65397	162112	121459	441320	365718
A-B9,B10	Akt	S473	155014	455364	490145	273862	301696	386461	77053	214769	225226	365130	453519	471970	17467	68377	143365	136650	334431	331530
			148436	397750	430789	313251	272227	426558	83500	211248	217463	349848	493241	415156	49102	82398	134422	163727	339633	345084
B-B11,B12	Akt	T308	306586	600137	712140	768135	406941	485374	231519	435713	408436	617058	534581	630372	245597	245714	164316	259944	583558	716842
			280204	783753	873659	1088425	502763	585791	280006	417198	365375	766780	611930	682806	262378	269956	196178	322192	653096	793370
B-B13,B14	p53	S46	1415632	2915428	3362614	4168301	2277778	2556047	1591116	1113744	2370052	3312284	2859695	2907966	1824420	1829573	1956619	2025864	2597149	3168429
			1508289	2832369	3696281	4203658	2303832	2778737	1684350	1124306	2696975	3400389	3133933	3333009	1820904	2041570	2117007	2253202	2598951	3295552
A-C1,C2	TOR	S2448	222173	348322	235906	219601	98878	305862	203630	284968	263458	358714	237555	203878	162676	193600	167657	221885	427411	259087
			245440	340016	262341	188143	100441	296013	159156	273573	212623	303624	213014	195280	141160	183627	149378	263667	414903	291172
A-C3,C4	CREB	S133	737814	1502512	2066179	1051581	236436	898646	730294	605510	203042	357473	301782	593957	442925	122987	113528	528359	2135272	446245
			746391	1468065	2088294	1035521	234843	832807	635085	495776	209677	360491	314140	585268	380796	124452	114657	528750	1954912	449946
A-C5,C6	HSP27	S78/S82	266356	350791	266660	211727	140504	182832	59734	125863	253481	257586	188619	228446	24083	103447	117274	130061	451263	275184
			247582	320762	269062	199010	144000	170294	47917	80204	226800	270565	225663	296515	18736	90068	128459	92363	365494	281294
A-C7,C8	AMPKα2	T172	174219	494596	485471	357621	311660	299544	193354	319401	560244	460869	579301	590705	50356	172975	243354	215158	546368	478961
			168189	499963	469977	380804	348203	298459	219678	410420	476504	490042	562504	566145	58147	159100	215872	237269	473172	457906
A-C9,C10	β-Catenin	___	769152	276064	253004	225221	144120	136611	62628	191189	158988	171458	139167	162989	10335	46564	104485	93055	144823	187236
			755356	263558	278617	237594	121397	135355	84580	175348	185145	195182	135873	157603	12110	34701	97582	61339	96766	169093
B-C11,C12	p70	S6	304430	619460	524943	445728	216326	308788	239356	251837	163744	335291	336656	392996	176839	126762	153587	217288	477568	460548
			288678	641721	569980	489787	268717	317511	276928	283066	159353	358210	356065	389261	175774	120833	168790	244719	465166	437502
B-C13,C14	p53	S15	172741	1401996	1703447	1424154	943938	900578	762446	571237	1325935	1568100	1665945	1364312	935898	632296	833939	551519	1353016	1509547
			159217	1377849	1685350	1519138	981966	904636	727561	525695	1423563	1690368	1723868	1451934	680256	734224	904089	635079	1598808	1513218
B-C15,C16	c-Jun	S63	74999	576849	556038	1123919	385861	518366	339838	446529	317698	509250	587263	664014	252704	216476	262451	410196	637886	481772
			66479	541565	482755	1034222	362591	540285	358721	406399	337292	533905	628068	708416	258814	218342	229117	498806	637193	449879
A-D1,D2	Src	Y419	374305	523520	430230	458362	205561	375808	314295	345767	352266	574513	417447	404417	232695	241449	224372	291108	713796	588489
			396500	547431	462838	389992	206337	404044	260096	326188	305996	580195	389278	385979	217771	238865	205801	299718	700631	577049
A-D3,D4	Lyn	Y397	142634	246798	230930	128454	107041	225026	118518	240506	190081	212468	130463	175224	72367	127368	68570	103615	398099	281688
			154042	247652	204812	135016	105373	185790	95736	172787	209721	226354	137256	194987	40923	115335	73132	105204	431564	261478
A-D5,D6	Lck	Y394	105635	159721	95095	76291	80680	129795	13248	62000	149238	159833	107701	157028	11120	71337	60944	64817	305851	200794
			107598	142087	121144	73543	87215	117231	0	17429	116819	168227	158989	188325	8022	47573	57169	51911	250289	178881
A-D7,D8	STAT2	Y689	369505	588076	572038	429901	377683	394284	214849	384594	482511	593554	694724	692541	20647	175539	249345	196176	617719	368511
			342904	610266	547189	470060	363241	389930	255145	451454	498051	552813	611884	645418	38677	157948	232341	215828	536638	365220
A-D9,D10	STAT5a	Y694	186511	195134	234559	215130	204750	206681	111773	269732	241029	259089	256735	286933	26641	54454	112376	111943	230711	177110
			179304	199984	227477	211262	176597	189464	114214	223348	224194	260401	217104	254485	37501	34153	122940	76902	172648	179593
B-D11,D12	p70	S6	358940	659928	703758	765913	387443	465853	369881	317706	320579	647858	596095	622999	208636	180841	221500	283177	755011	622347
			369685	643420	642189	787232	372337	429697	378126	344148	276858	634957	575891	589477	221647	184580	257533	340280	666778	659653
B-D13,D14	RSK1/2/3	S380/S386/S377	229786	296475	355129	406939	250067	292819	191724	188110	255057	350000	467356	470516	127450	137177	166660	166055	414338	438368
			244695	320564	338920	396343	245237	278887	179161	199132	283283	357157	458671	512373	123930	150490	166395	155620	404023	382840
B-D15,D16	eNOS	S1177	441026	170425	188215	249399	117777	153613	84227	129439	180394	213527	245529	236519	51846	77616	78738	47673	163170	181218
			423071	134260	170419	170803	118492	168788	91371	125427	192147	226677	247933	236199	58247	75697	86154	71510	143877	179126
A-E1,E2	Fyn	Y420	103215	233757	121903	128954	56426	232040	183028	219582	172797	220804	171337	141937	103406	142579	109305	132033	285182	247388
			94933	235309	138648	104038	68567	223725	160335	211805	171462	214833	158979	130283	105635	148218	108972	137652	278738	265696
A-E3,E4	Yes	Y426	298814	623975	552964	391157	206154	325401	315410	418498	353226	464764	268023	282853	162629	242277	194876	258848	594670	446645
			280664	605315	549269	439346	227248	307616	283339	341599	345184	481094	298882	330823	145626	236762	223037	249544	614086	461925
A-E5,E6	Fgr	Y412	202032	194131	94615	64389	77645	87058	47869	104120	123292	147685	92452	90504	18952	67648	54079	74573	251379	180946
			191624	162815	103208	69729	81499	80956	28988	46808	126270	152217	136519	103662	11320	56192	40226	36194	243581	163583
A-E7,E8	STAT6	Y641	448534	390178	338256	269108	230454	260775	157596	212679	357517	383705	448049	442762	40558	140321	229402	169595	455709	292307
			439477	369270	311353	292115	238729	260180	167611	215319	339193	457379	434552	422628	76041	131584	187310	162570	407447	249229
A-E9,E10	STAT5b	Y699	165523	291221	276983	230964	180767	211770	178343	233032	296946	311320	366861	339415	49650	86191	127357	105572	239997	191031
			142465	300214	267134	218593	206343	202686	178395	240222	256022	290689	329251	331407	54402	68866	122349	82202	178600	230119
B-E11,E12	STAT3	Y705	156277	230026	356961	317685	253071	254663	229476	197362	267715	361781	326792	344599	128216	121840	126578	141934	254915	322137
			181756	281960	368387	325845	237564	236539	238486	219254	232840	322515	311312	258005	130690	138119	158339	168033	291526	327079
B-E13,E14	p27	T198	214966	350027	399825	322262	108371	94149	170115	186388	138094	199131	218621	225426	54460	73303	95017	82123	225604	211925
			201578	361575	382517	325812	98726	89769	174886	196079	141354	223044	209672	229589	59914	79644	98949	88936	205900	185741
B-E15,E16	PLC-γ1	Y783	188042	275802	346306	407798	150593	142649	125881	187791	213090	258005	232319	230424	84356	114462	123538	109595	239826	232035
			186714	273097	325658	334385	130856	138966	143381	199252	255760	267358	235087	227967	111834	108871	127728	111776	233675	247717
A-F1,F2	Hck	Y411	286307	261517	179187	228483	97191	241168	270445	401847	275648	272148	211468	153927	315273	258140	160084	154053	410950	291805
			315716	332459	236149	173239	113855	256190	282076	373522	254659	270258	197677	150904	248518	282757	155815	204779	424436	300980
A-F3,F4	Chk-2	T68	522164	778317	611099	565274	349138	514776	393793	474656	376760	565110	378767	341996	235836	383420	333858	397751	743487	516886
			475537	751900	582200	569540	385808	480218	381438	428753	382424	597673	393988	347492	243658	350389	356273	396602	770346	578059
A-F5,F6	FAK	Y397	422912	447138	372984	391956	155400	191102	144485	179929	208927	323418	208800	170018	62176	136862	130512	170824	547595	309882
			376913	423594	352634	326727	163174	194303	137645	131677	170780	323090	278574	225587	47084	105861	113026	126016	486918	260152
A-F7,F8	PDGF	Rβ	295751	305519	295334	252226	157837	152377	87055	97943	157903	248918	229139	196079	16799	69113	111728	86830	356434	182187
			278854	311141	265513	267062	147221	137857	98344	107886	166332	232397	228004	219391	18453	55306	80500	86965	326217	177065
A-F9,F10	STAT5a/b	Y694/Y699	339365	372702	358035	384246	285244	226307	207625	234096	358425	352683	339323	350752	90212	163863	185014	156231	245432	249097
			288858	340286	356557	334003	251800	216596	206603	234586	349675	334037	315022	350654	139515	139907	188989	129675	217688	276229
B-F11,F12	STAT3	S727	226095	382919	341551	414255	132625	207550	199345	213691	287726	299816	277220	290215	114885	104664	117007	131241	357347	413278
			246898	425115	381941	441365	140666	210413	213225	247847	262035	281633	231856	316364	103814	86742	116309	145480	380116	373556
B-F13,F14	WNK1	T60	551900	1042092	1357633	977075	452841	661895	550209	453292	318948	571235	578333	832925	224788	188066	229815	465923	953961	492518
			535785	1118596	1257200	926373	413850	687564	542661	444414	289634	631723	613128	820274	216978	191465	238215	462947	983221	454915
B-F15,F16	PYK2	Y402	274873	402580	470619	528336	195340	209947	151910	230240	236171	298372	277914	246973	102262	144616	194434	184469	311821	294805
			298561	393440	404475	471713	192892	191402	145345	200454	274852	311959	268225	249496	111692	135221	185957	151782	306473	297771
A-G1,G2	Reference	Spot	3765637	4232130	4561494	4243718	3056803	3699206	3285156	3218305	4366458	3810957	3846614	2776065	2486566	3426543	3517685	2906036	4537626	3331209
			3671062	4020592	4315691	4356461	2780525	3526248	3229064	3274997	3979553	3428420	3686800	3198125	2657760	3065497	3511056	2874756	4677934	3636015
A-G3,G4	PRAS40	T246	871399	1636969	1622461	756178	791845	1118793	859681	744598	480672	836958	973763	648997	500223	395411	460366	967509	1725521	818567
			766624	1625665	1444832	680973	700114	1058661	828415	645874	588631	932141	1029998	648464	482622	333451	444299	929879	1594864	753078
B-G11,G12	HSP60	___	1189711	1635107	1724778	2151573	1105101	1540337	1054817	1134276	872869	1291370	1442932	1715134	664284	719123	561981	1183194	1403408	1008647
			1173837	1405775	1558268	1824700	1053657	1348180	1011341	1054255	819369	1338699	1418736	1518054	701388	729619	602948	1218620	1387275	1028545
